# Supplementary material for: Role of arsenic (+3 oxidation state) methyltransferase in arsenic mediated APL treatment: anin vitroinvestigation
Source: Royal Society of Chemistry journal article supplement (doi:10.1039/c8mt00057c), 2018-01-01

**Supporting Online Materials for**

**Role of Arsenic (+3 oxidation state) Methyltransferase in Arsenic Mediated APL**

**Treatment: An in vitro Investigation**

Yasen Maimaitiyiming<sup>1\*</sup>, Chao Wang<sup>1</sup>, Shi Xu<sup>2</sup>, Khairul Islam<sup>1</sup>,  
Ye Jia Chen<sup>1</sup>, Chang Yang<sup>1,2</sup>, Qian Qian Wang<sup>1,2</sup>, Hua Naranmandura<sup>1,2</sup>

<sup>1</sup>Department of Toxicology, School of Medicine and Public health,  
Zhejiang University

<sup>2</sup>Department of Pharmaceutical Sciences, Zhejiang University  
Hangzhou, 310058 China

<sup>†</sup>To whom correspondence should be addressed:

Dr. Hua Naranmandura

Department of Toxicology, School of Medicine, Zhejiang University,  
Hangzhou, Zhejiang, 310058, China

Fax/Phone: (86) 571-8820-6736

E-mail: narenman@zju.edu.cn

\* These authors contributed equally to this work

**Table S1.**

| Gene    | Primer Sequence (5'-3')                                  | T <sub>A</sub> (°C) | Cycle |
|---------|----------------------------------------------------------|---------------------|-------|
| AS3MT   | FP: GACGTGCAGACCTACTACGG<br>RP: ACCCAGACACTCACCCATA      | 55                  | 35    |
| MRP-1   | FP: ATGTCACGTGGAATACCAGC<br>RP: GAAGACTGAACTCCCTTCCT     | 57                  | 35    |
| MRP-2   | FP: ACAGAGGCTGGTGGCAACC<br>RP: ACCATTACCTTGTCACTGTCCATGA | 59                  | 35    |
| β-actin | FP: GCTGTCACCTTCACCGTTCC<br>RP: CTCCATCCTGGCCTCGCTGT     | 61                  | 28    |

T<sub>A</sub>: Annealing Temperature

## Supplementary Figure Legends and Figures

### **Figure S1. Comparison of PML-RAR $\alpha$ fusion protein degradation in 293T cells with or without co-expression of AS3MT**

Flag-PML-RAR $\alpha$  was co-transfected with vector or GFP-AS3MT in 293T cells. 24h after transfection, cells were treated with 2 $\mu$ M iAs<sup>III</sup> for 12h. Then, degradation of PML-RAR $\alpha$  fusion protein was detected by western blot.

### **Figure S2. Protein Expression of MRP Isoforms in Different Cell Lines**

Cellular localization of MRP1 (A) and MRP2 proteins (B) in HeLa, HepG2 and HEK293T cells were imaged with a laser scanning confocal microscope as described in materials and methods. The green fluorescence indicates MRP1 and 2, while the blue fluorescence indicates cell nucleus. Gene (mRNA) expressions of MRP1 and 2 were determined by RT-PCR (C) and MRP protein expressions in HeLa, HepG2 and HEK293T were determined by western blot (D). Moreover, protein expression of AS3MT in HepG2 cells was determined by western blot with anti-GFP antibody 24h after transfection of GFP-hAs3MT gene into HepG2 cells (E). Intracellular localization and expression of AS3MT was observed by a laser scanning confocal microscope (F).

**Figure S1**

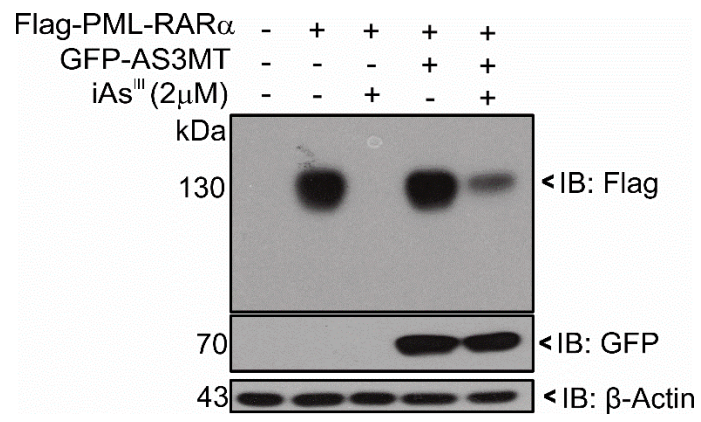

Figure S2

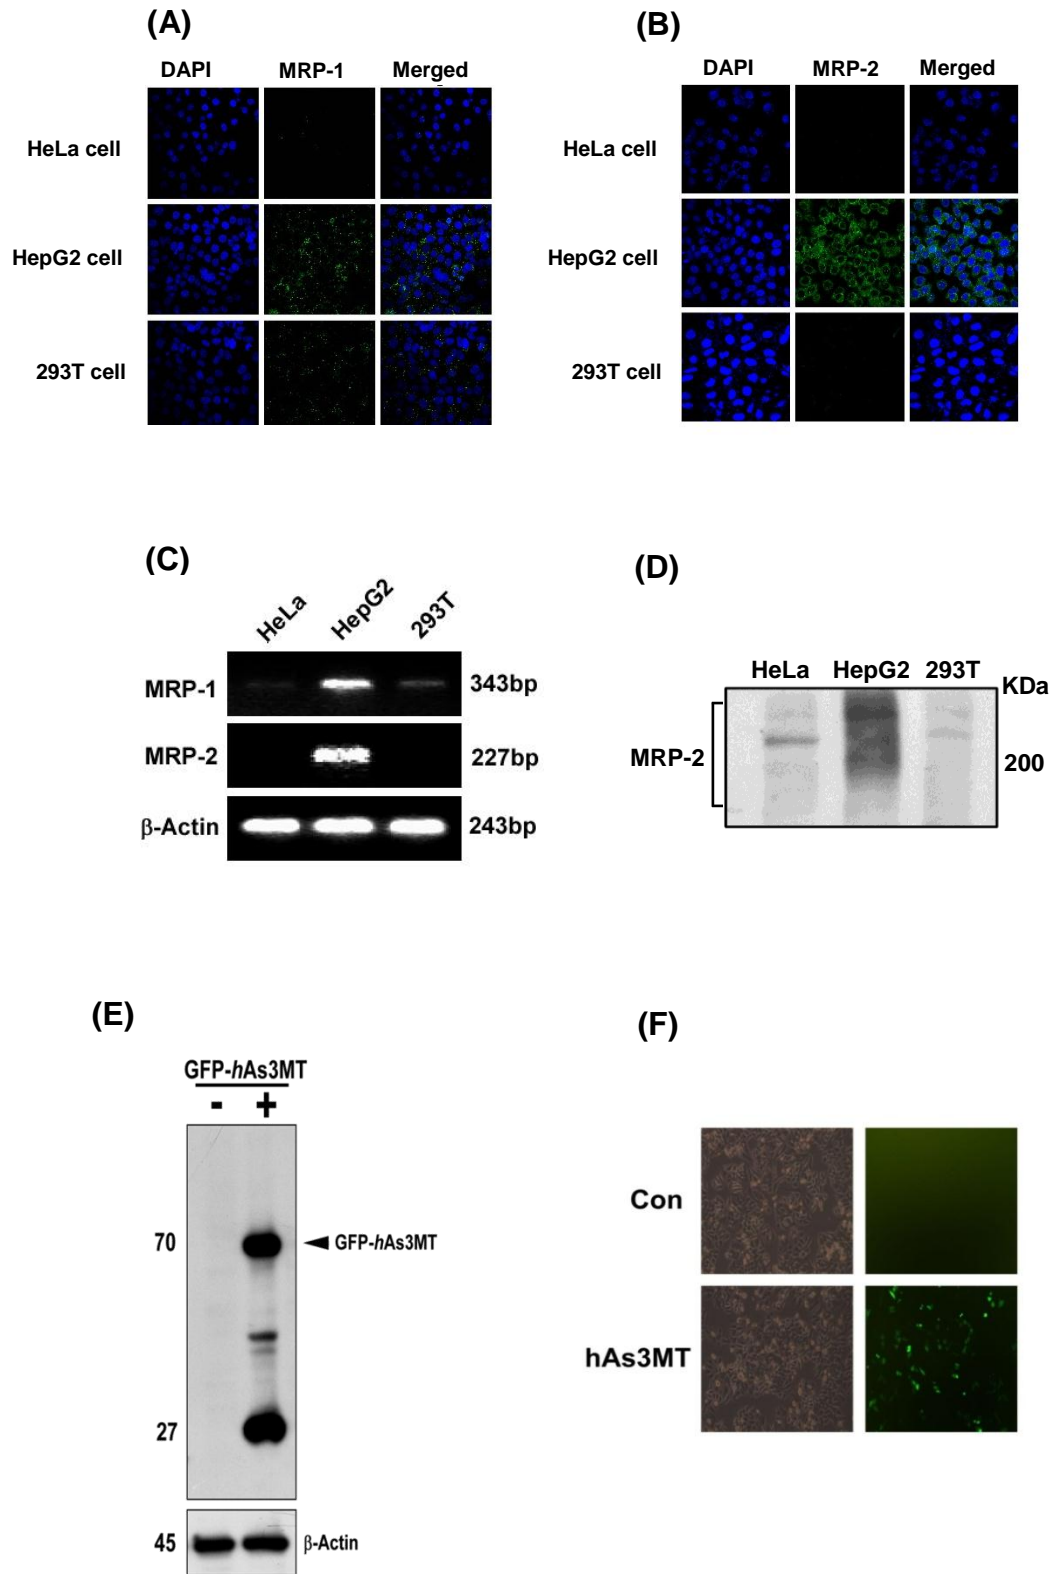

Supplement: c8mt00057c1.pdf [file c8mt00057c1.pdf]
